# Supplementary material for: Identification of critical base pairs required for CTCF binding in motif M1 and M2
Source: PubMed Central journal article supplement (PMC5498337; doi:10.1007/s13238-017-0387-5), 2017-03-17
Supplement: 13238_2017_387_MOESM3_ESM.pdf [file 13238_2017_387_MOESM3_ESM.pdf]

**Supplementary Table S1. Sequence of primers used for constructing pGEX-4T-2-hCTCF-ZF expression vector.**

| Name                 | Sequence (from 5' to 3')                     |
|----------------------|----------------------------------------------|
| pGEX-4T-2-hCTCF-ZF-F | 5'-CCGCTCGAGCGGTGTAAAGAAGACATTCCAGTG-3'      |
| pGEX-4T-2-hCTCF-ZF-R | 5'-ACGCGTCTGACTCAGCCATCTGGGCCAGCACAATTATC-3' |

**Supplementary Table S2. Sequence of probes used for EMSA experiments.**

| Name      | Sequence (from 5' to 3')              |
|-----------|---------------------------------------|
| M1-F      | 5'-CTTTTTGGTGCCCTCTGCTGGCCAGTTTAG-3'  |
| M1-R      | 5'-CTAAACTGGCCAGCAGAGGGCACCAAAAAG-3'  |
| M2-F      | 5'-CTTTTGGAAGTGCAGTTTAG-3'            |
| M2-R      | 5'-CTAAACTGCAGTTCCAAAAG-3'            |
| M1-Mut1-F | 5'-CTTTTGTGGCCCTCTGCTGGCCAGTTTAG-3'   |
| M1-Mut1-R | 5'-CTAAACTGGCCAGCAGAGGGCAAACAAAAG-3'  |
| M1-Mut2-F | 5'-CTTTTGGGAACCTCTGCTGGCCAGTTTAG-3'   |
| M1-Mut2-R | 5'-CTAAACTGGCCAGCAGAGGTTCCCAAAAAG-3'  |
| M1-Mut3-F | 5'-CTTTTGGTGCAAAGTCTGCTGGCCAGTTTAG-3' |
| M1-Mut3-R | 5'-CTAAACTGGCCAGCAGTTTGCACCAAAAAG-3'  |
| M1-Mut4-F | 5'-CTTTTGGTGCCCTCGTATGGCCAGTTTAG-3'   |
| M1-Mut4-R | 5'-CTAAACTGGCCATACGAGGGCACCAAAAAG-3'  |
| M1-Mut5-F | 5'-CTTTTGGTGCCCTCTGCGTTCCAGTTTAG-3'   |
| M1-Mut5-R | 5'-CTAAACTGGAACGCAGAGGGCACCAAAAAG-3'  |
| M1-Mut6-F | 5'-CTTTTGGTGCCCTCTGCTGGAACGTTTAG-3'   |
| M1-Mut6-R | 5'-CTAAACGTTCCAGCAGAGGGCACCAAAAAG-3'  |
| M1-Mut7-F | 5'-CTTTTGGTGCCCAAGGCTGGCCAGTTTAG-3'   |
| M1-Mut7-R | 5'-CTAAACTGGCCAGCCTTGGGCACCAAAAAG-3'  |
| M1-Mut8-F | 5'-CTTTTGGGTGCCCTCTGCTGGCCAGTTTAG-3'  |
| M1-Mut8-R | 5'-CTAAACTGGCCAGCAGAGGGCACCAAAAAG-3'  |
| M1-Mut9-F | 5'-CTTTTTTGTGCCCTCTGCTGGCCAGTTTAG-3'  |

|            |                                        |
|------------|----------------------------------------|
| M1-Mut9-R  | 5'-CTAAACTGGCCAGCAGAGGGCACAAAAAAG-3'   |
| M1-Mut10-F | 5'-CTTTTTGTTGCCCTCTGCTGGCCAGTTTAG-3'   |
| M1-Mut10-R | 5'-CTAAACTGGCCAGCAGAGGGCAACAAAAAAG-3'  |
| M1-Mut11-F | 5'-CTTTTTGTGTGCCCTCTGCTGGCCAGTTTAG-3'  |
| M1-Mut11-R | 5'-CTAAACTGGCCAGCAGAGGGCACACAAAAAAG-3' |
| M1-Mut12-F | 5'-CTTTTTTTTTGCCCTCTGCTGGCCAGTTTAG-3'  |
| M1-Mut12-R | 5'-CTAAACTGGCCAGCAGAGGGCAAAAAAAG-3'    |
| M1-Mut13-F | 5'-CTTTTTGTGGCCCTCTGCTGGCCAGTTTAG-3'   |
| M1-Mut13-R | 5'-CTAAACTGGCCAGCAGAGGGCCACAAAAAAG-3'  |
| M2-Mut1-F  | 5'-CTTTTGGACCTGCAGTTTAG-3              |
| M2-Mut1-R  | 5'-CTAAACTGCAGGTCCAAAAG-3              |
| M2-Mut2-F  | 5'-CTTTTGGAACGGCAGTTTAG-3              |
| M2-Mut2-R  | 5'-CTAAACTGCCGTTCCAAAAG-3              |
| M2-Mut3-F  | 5'-CTTTTGGAACTGAAGTTTAG-3              |
| M2-Mut3-R  | 5'-CTAAACTTCAGTTCCAAAAG-3              |

**Supplementary Table S3. Sequence of oligos used for constructing pFlag-CMV-4 vector.**

| Name      | Sequence (from 5' to 3')                  |
|-----------|-------------------------------------------|
| M1-F      | 5'-AATTCTTTTGGTGCCCTCTGCTGGCCAGTTTAG-3'   |
| M1-R      | 5'-CTAGCTAAACTGGCCAGCAGAGGGCACCAAAAAAG-3' |
| M2-F      | 5'-AATTCTTTTGGAACCTGCAGTTTAG-3'           |
| M2-R      | 5'-CTAGCTAAACTGCAGTTCCAAAAG-3'            |
| M1-Mut1-F | 5'-AATTCTTTTGTTTGCCCTCTGCTGGCCAGTTTAG-3'  |
| M1-Mut1-R | 5'-CTAGCTAAACTGGCCAGCAGAGGGCAACAAAAAAG-3' |
| M2-Mut1-F | 5'-AATTCTTTTGGACCTGCAGTTTAG-3             |
| M2-Mut1-R | 5'-CTAGCTAAACTGCAGGTCCAAAAG-3             |
| M2-Mut2-F | 5'-AATTCTTTTGGAACGGCAGTTTAG-3             |
| M2-Mut2-R | 5'-CTAGCTAAACTGCCGTTCCAAAAG-3             |

|           |                               |
|-----------|-------------------------------|
| M2-Mut3-F | 5'-AATTCTTTTGGAACTGAAGTTTAG-3 |
| M2-Mut3-R | 5'-CTAGCTAAACTTCAGTTCCAAAAG-3 |

**Supplementary Table S4. Sequence of primers used for ChIP-qPCR.**

| Name             | Sequence (from 5' to 3')     |
|------------------|------------------------------|
| pFlag-negative-F | 5'-GAGTGTGTCTTCCCGTTTTCCG-3' |
| pFlag-negative-R | 5'-CCTATGGAAAAACGCCAGCAAC-3' |
| pFlag-positive-F | 5'-ATGGACTACAAAGACGATGACG-3' |
| pFlag-positive-R | 5'-ACTGGGGAGGGGTCACAGGGAT-3' |
